# Supplementary material for: Oral exposure to arsenic causes hearing loss in young people aged 12–29 years and in young mice
Source: PubMed Central journal article supplement (PMC5533757; doi:10.1038/s41598-017-06096-0), 2017-07-28

**Oral exposure to arsenic causes hearing loss in young people aged 12-29 years and in young mice**

Xiang Li<sup>1</sup>, Nobutaka Ohgami<sup>1,2,3</sup>, Yasuhiro Omata<sup>1</sup>, Ichiro Yajima<sup>1,3</sup>, Machiko Iida<sup>1</sup>, Reina Oshino<sup>1,3</sup>, Shoko Ohnuma<sup>3</sup>, Nazmul Ahsan<sup>3,4</sup>, Anwarul Azim Akhand<sup>3,4</sup> and Masashi Kato<sup>1,3,\*</sup>

**Author Affiliation:**

<sup>1</sup>Department of Occupational and Environmental Health, Nagoya University Graduate School of Medicine, Nagoya, Japan.

<sup>2</sup>Nutritional Health Science Research Center, Chubu University, 1200 Matsumoto, Kasugai, Aichi 487-8501, Japan.

<sup>3</sup>Voluntary Body for International Health Care in Universities, Nagoya, Japan.

<sup>4</sup>Department of Genetic Engineering and Biotechnology, University of Dhaka, Dhaka-1000, Bangladesh.

**\*Correspondence:**

Masashi Kato M.D., Ph.D.

Department of Occupational and Environmental Health,

Nagoya University Graduate School of Medicine

Address: 65 Tsurumai-cho, Showa-ku, Nagoya, Aichi 466-8550, Japan.

Phone: +81-52-744-2122. Fax: +81-52-744-2124.

E-mail: [katomasa@med.nagoya-u.ac.jp](mailto:katomasa@med.nagoya-u.ac.jp)

## **Supplementary information**

### **Figure legend**

**Figure S1. Correlations of hearing thresholds in people aged 12-29 years with As levels in hair.** Correlations of hearing levels (dB) at 1 kHz (A), 4 kHz (B), 8 kHz (C) and 12 kHz (D) with As levels in hair ( $\mu\text{g/g}$ ) were determined by Spearman correlation coefficients.

**Figure S2. Correlations of hearing thresholds in people aged 12-29 years with duration of drinking tube well water.** Correlations of hearing levels (dB) at 1 kHz (A), 4 kHz (B), 8 kHz (C) and 12 kHz (D) with duration of drinking tube well water (years) were determined by Spearman correlation coefficients.

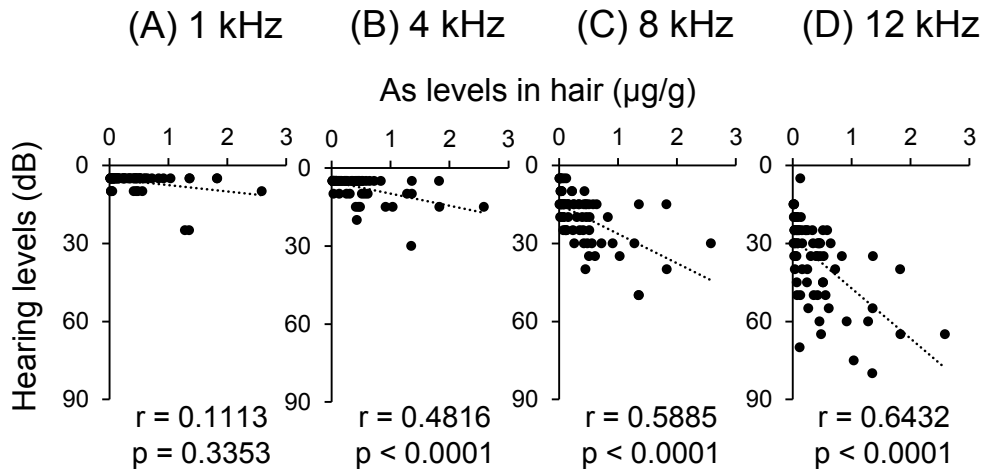

(A) 1 kHz      (B) 4 kHz      (C) 8 kHz      (D) 12 kHz

duration of drinking tube well water (years)

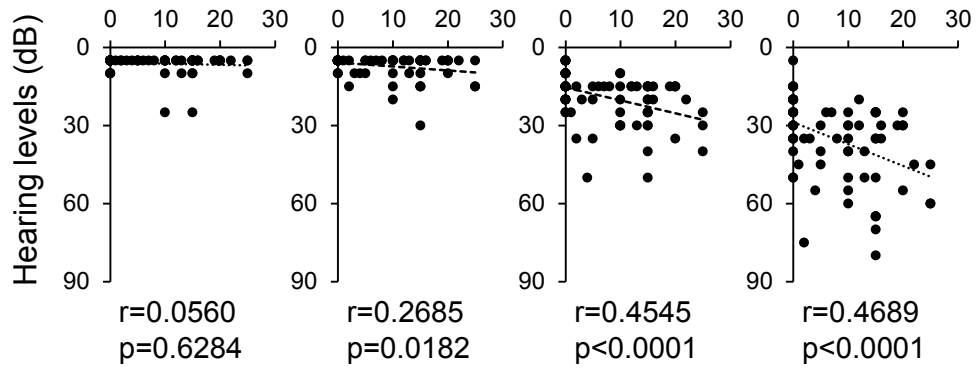

Supplement: 41598_2017_6096_MOESM1_ESM.pdf [file 41598_2017_6096_MOESM1_ESM.pdf]
